# Supplementary material for: Self-healable polymer gels with multi-responsiveness of gel–sol–gel transition and degradability
Source: Royal Society of Chemistry journal article supplement (doi:10.1039/c6py02122k), 2017-01-01
Supplement: c6py02122k1.pdf [file c6py02122k1.pdf]

## Supplementary Information

# Self-Healable Polymer Gels with Multi-Responsiveness of Gel-Sol-Gel Transition and Degradability

Ruixue Chang, Heng An, Xu Li, Ruyi Zhou, Jianglei Qin,\* Yuelan Tian and Kuilin Deng

College of Chemistry and Environmental Science, Hebei University, 180 East Wusi Road, Baoding 071002, China.

## Contents

Fig. S1  $^{13}\text{C}$  NMR of FPA in  $\text{CDCl}_3$ .

Fig. S2. GPC curve of  $\text{P}(\text{NIPAM}_{179}\text{-co-FPA}_9)$ .

Fig. S3. The 8%  $\text{P}(\text{NIPAM}_{344}\text{-co-FPA}_8)$  water solution (a) , after warmed in hand for 3 min (b) and transmission change upon heating (c) (0.5% concentration).

Fig. S4 DSC curves of  $\text{P}(\text{NIPAM-co-FPA})$  compared with PNIPAM homopolymer.

Scheme S1. Synthesis of benzaldehyde terminated PEO.

Fig. S5  $^1\text{H}$  NMR spectra of  $\text{PEO}_{23}\text{di-acylhydrazine}$ .

Fig. S6 Polymer gel prepared from  $\text{P}(\text{NIIPAM}_{179}\text{-co-FPA}_9)$  and  $\text{PEO}_{90}$  di-acylhydrazine with 10 wt% gelator concentration in DMSO did not self-heal in 72 h under 10% acetic acid catalysis.

Fig. S7 Polymer gels prepared from  $\text{P}(\text{NIIPAM}_{344}\text{-co-FPA}_8)$  and  $\text{PEO}_{90}$  di-acylhydrazine with gelator concentration of 10 wt% in DMF. No acetic acid was added in (a) and acetic acid concentration for (b) is 10%.

Fig. S8 The self-healing property of polymer gel with 1:1.5 group ratio of aldehyde to acylhydrazine. (a: as prepared; b: cut into 2 pieces; c: self-healed gel under stretching)

Fig. S9 Self-healing of organic polymer gel with 5% of gelator concentration and 1:1 group ratio.

Fig. S10 Self-healing property of organic polymer gel with 10% of  $\text{P}(\text{NIIPAM}_{179}\text{-co-FPA}_9)$  and  $\text{PEO}_{227}$  di-acylhydrazine 1:1 group ratio.

Fig. S11 DMF was absorbed by the polymer gel prepared from  $\text{P}(\text{NIIPAM}_{179}\text{-co-FPA}_9)$  and  $\text{PEO}_{227}$  di-acylhydrazine in 12 h.

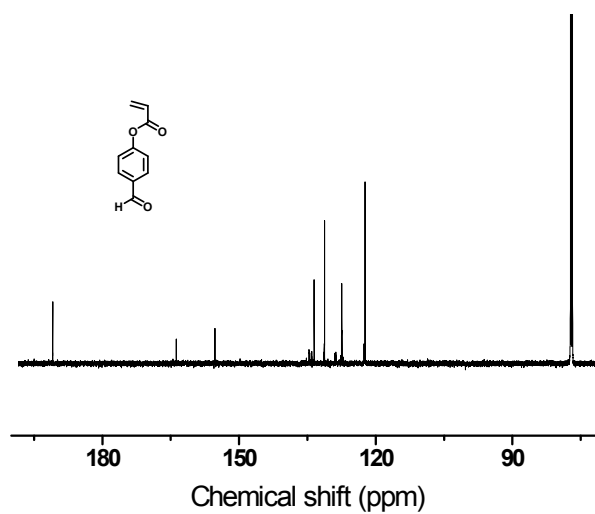

Fig. S1  $^{13}\text{C}$  NMR of FPA in  $\text{CDCl}_3$ .

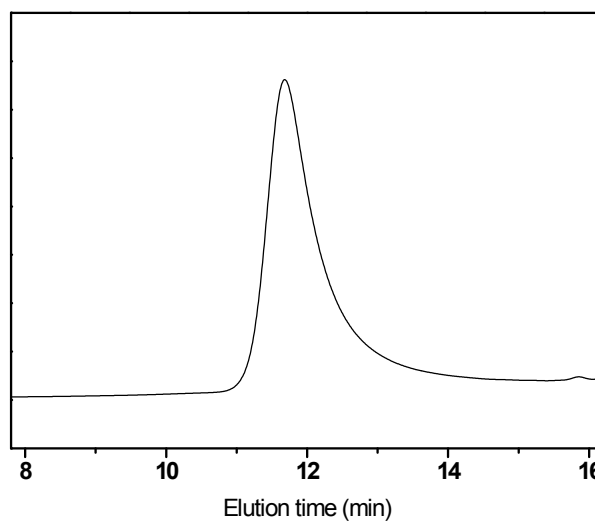

Fig. S2 GPC curve of  $\text{P}(\text{NIPAM}_{179}\text{-co-FPA}_9)$ .

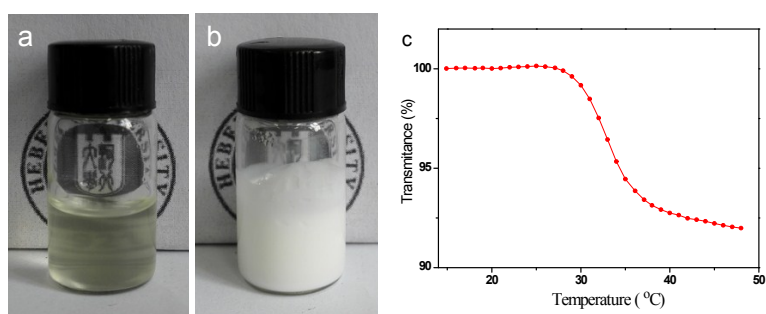

Fig. S3 The 8%  $\text{P}(\text{NIPAM}_{344}\text{-co-FPA}_8)$  water solution (a) , after warmed in hand for 3 min (b) and transmission change upon heating (c) (0.5% concentration). (Credit from Hebei University)

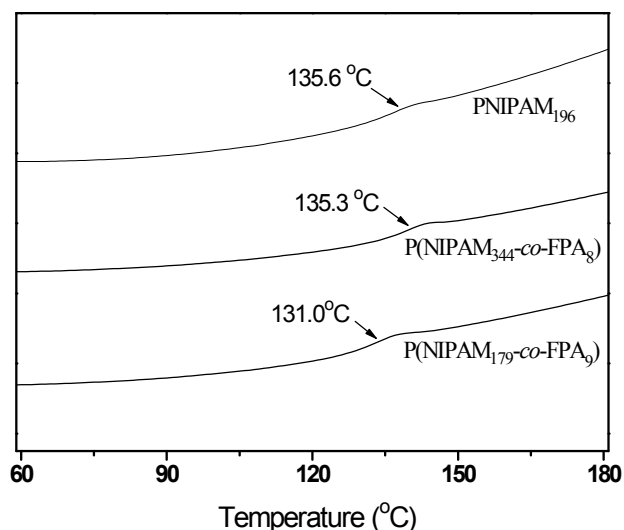

Fig. S4 DSC curves of P(NIPAM-*co*-FPA) compared with homopolymer.

### Synthesis of acylhydrazine-terminated PEO (PEO di-acylhydrazine).

The synthesis of PEO with two acylhydrazine-terminal groups was carried out according to literature as shown in Scheme S1. [1] PEO (DP=23, 90 and 227 respectively) was dried by azeotropic distillation in toluene. The synthesis of procedure was carried out with PEO<sub>90</sub> as an example. 20 g (5 mmol) PEO<sub>90</sub> was dissolved in 40 mL dry dichloromethane (CH<sub>2</sub>Cl<sub>2</sub>) in a 250 mL flask and the solution was cooled to 0 °C in an ice bath. Then triethylamine (5.5 mL, 40 mmol) and 4-toluene sulfonyl chloride (7.6 g, 40 mmol) were added successively. After stirred for 2 h at 0°C, the temperature was increased to room temperature gradually and stirred for another 24h. The reaction mixture was dilute by CH<sub>2</sub>Cl<sub>2</sub> and extracted by 300 mL saturated NaHCO<sub>3</sub> solution three times (100mL for each extraction). The organic phase was dried by anhydrous MgSO<sub>4</sub> and the 4-toluene sulfonyl terminated PEO<sub>90</sub> (I) was collected by precipitating in petroleum ether (Yield 90%).

4-toluene sulfonyl terminated PEO<sub>90</sub> (I) (10 g, 2.5 mmol) and 4-ethyl hydroxybenzoate(3.3 g, 20 mmol) were dissolved in DMF(40 mL), then K<sub>2</sub>CO<sub>3</sub> (27 g, 20 mmol) was added into the solution. The mixture was stirred for 72 h days at 80°C. After cooled to room temperature, the mixture was diluted by 100 mL water, and the solution was extracted with 150 mL CH<sub>2</sub>Cl<sub>2</sub> (5 times, 30 mL each). The organic layer was washed by Na<sub>2</sub>CO<sub>3</sub> and dried by anhydrous MgSO<sub>4</sub>. The product of ethyl benzoate-terminated PEO (II) was obtained by precipitating in petroleum ether twice (yield 85%).

Synthesis of acylhydrazine-terminated PEO. 8 g (4mmol) 4-ethyl benzoate-terminated PEO (II)

was dissolved in 40 mL methanol, then 20 mL hydrazine hydrate (80% in water, w/w) was added into the solution. The reaction mixture was refluxed for 72 h at 80 °C. After cooled to room temperature, the methanol was removed by rotary evaporation and the solution was diluted with 100 mL water. The solution was extracted with 150 mL CH<sub>2</sub>Cl<sub>2</sub> (5 times, 30 mL each). The CH<sub>2</sub>Cl<sub>2</sub> solution was washed with saturated NaCl solution 3 times and dried over by MgSO<sub>4</sub>. The product of PEO di-acylhydrazine was collected by precipitating in petroleum ether and dried under vacuum (yield: 70%). <sup>1</sup>H NMR is shown in Figure S3.

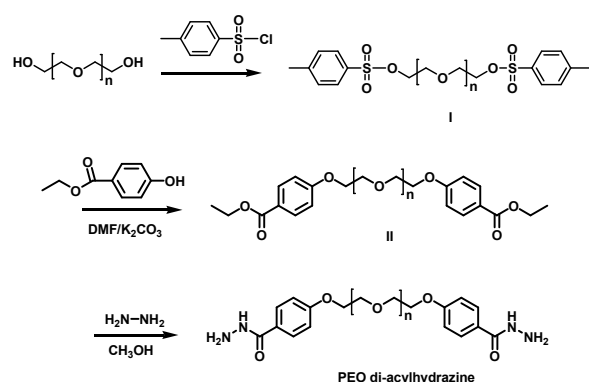

Scheme S1. Synthesis of benzaldehyde terminated PEO.

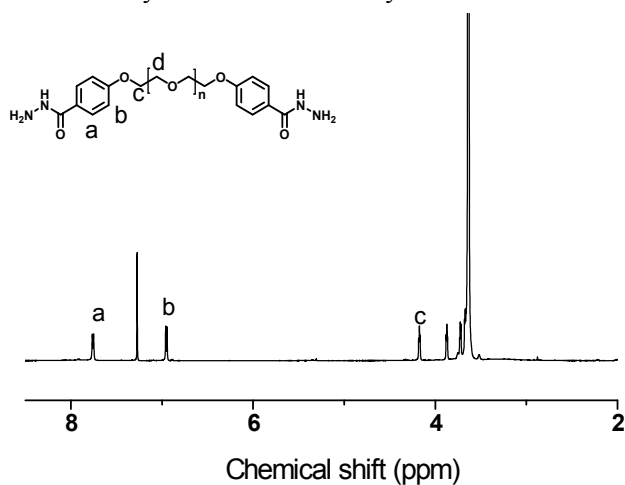

Fig. S5 <sup>1</sup>H NMR spectra of PEO<sub>23</sub> di-acylhydrazine.

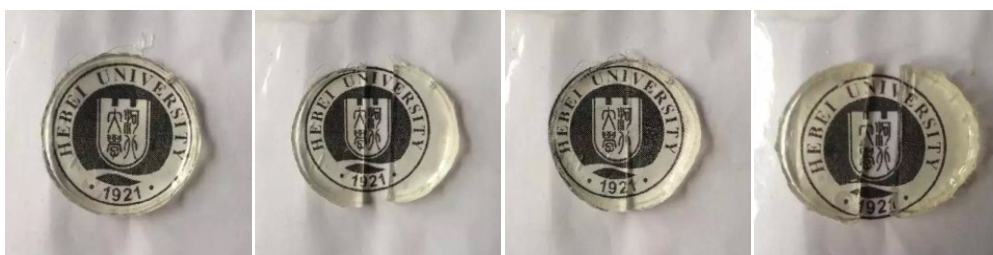

Fig. S6 Polymer gel prepared from P(NIIPAM<sub>179</sub>-co-FPA<sub>9</sub>) and PEO<sub>90</sub> di-acylhydrazine with 10 wt% gelator concentration in DMSO did not self-heal in 72 h under 10% acetic acid catalysis. (Credit from Hebei University)

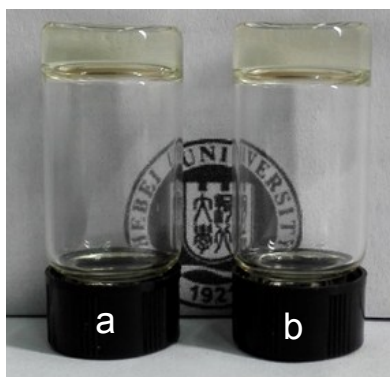

Fig. S7 Polymer gels prepared from P(NIIPAM<sub>344</sub>-co-FPA<sub>8</sub>) and PEO<sub>90</sub> di-acylhydrazine with gelator concentration of 10 wt% in DMF. No acetic acid was added in (a) and acetic acid concentration for (b) is 10%. (Credit from Hebei University)

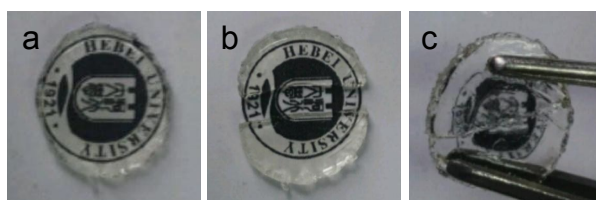

Fig. S8 The self-healing property of polymer gel with 1:1.5 group ratio of aldehyde to acylhydrazine. (a: as prepared; b: cut into 2 pieces; c: self-healed gel under stretching) (Credit from Hebei University)

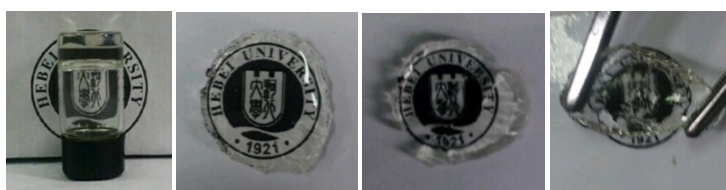

Fig. S9 Self-healing of organic polymer gel with 5% of gelator concentration and 1:1 group ratio. (Credit from Hebei University)

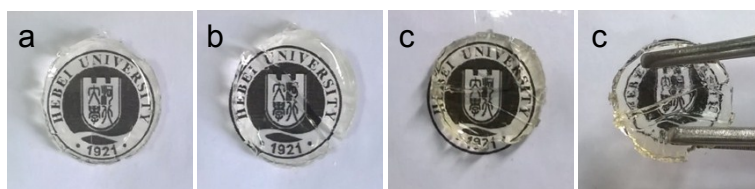

Fig. S10 Self-healing property of organic polymer gel with 10% of P(NIIPAM<sub>179</sub>-co-FPA<sub>9</sub>) and PEO<sub>227</sub> di-acylhydrazine 1:1 group ratio. (Credit from Hebei University)

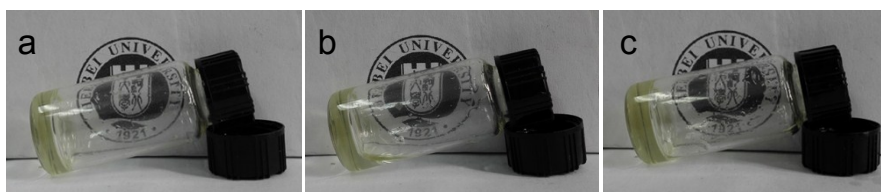

Fig. S11 DMF was absorbed by the polymer gel prepared from P(NIIPAM<sub>179</sub>-co-FPA<sub>9</sub>) and PEO<sub>227</sub> di-acylhydrazine in 12 h. (Credit from Hebei University)

[1] G. H. Deng, F. Y. Li, H. X. Yu, F. Y. Liu, C. Y. Liu, W. X. Sun, H. F. Jiang and Y. M. Chen, *Acs Macro Letters* **2012**, *1*, 275-279.
